# Supplementary material for: Agomelatine, a Melatonin-Derived Drug, as a New Strategy for the Treatment of Colorectal Cancer
Source: MDPI journal article supplement (doi:10.3390/antiox12040926), 2023-04-13
Supplement: s1 [file s1]

# SUPPLEMENTARY

**Table S1:** primers used in this study

| Gen   | Gene Accession Number | Forward                        | Reverse                              |
|-------|-----------------------|--------------------------------|--------------------------------------|
| Per1  | NM_002616.3           | ttgatgtgatggcctgtgtggactgtggg  | gtgcagtttctgctgtaggtaaggctgg         |
| Per2  | NM_022817.3           | ttctccgttggaaccaccagacatctgc   | ccctgggtcccttttaagcctcatagtcttg      |
| Per3  | NM_001289862.2        | ggggactgcaaaagagaaaacgtccaggcg | aaaagggtcgattttcctaatacattatcaggacgc |
| Cry1  | NM_001413465.1        | gtgcgtaatccaaattggtattgtagc    | acatgatactccacaagtttgggtc            |
| Clock | NM_001267843.2        | ctatgaggatgatgtgtctgtgggaatgg  | aaaatcaaggcactatgggggtttttccctcg     |
| Bmal1 | NM_001178.6           | gcaaatggtcatttcagatgtatgg      | ggattcttacaaggaagaataaacgg           |
| Nr1d2 | NM_005126.5           | acttgaagctattctggaactaacat     | catgtcctcatcaattacagttttag           |
| Sirt1 | NM_012238.5           | tagacacgctggaacagggttc         | ctcctcgtacagcttcacagtc               |
| Prx1  | NM_002574.4           | gggtcttaaaggctgatgaaggcatctcg  | agctgggcacacttccccatgtttgtc          |
| UBC   | NM_001135592.2        | tgggatgcaaatcttcgtgaagaccctgac | accaagtgcagagtggactcttctggatg        |

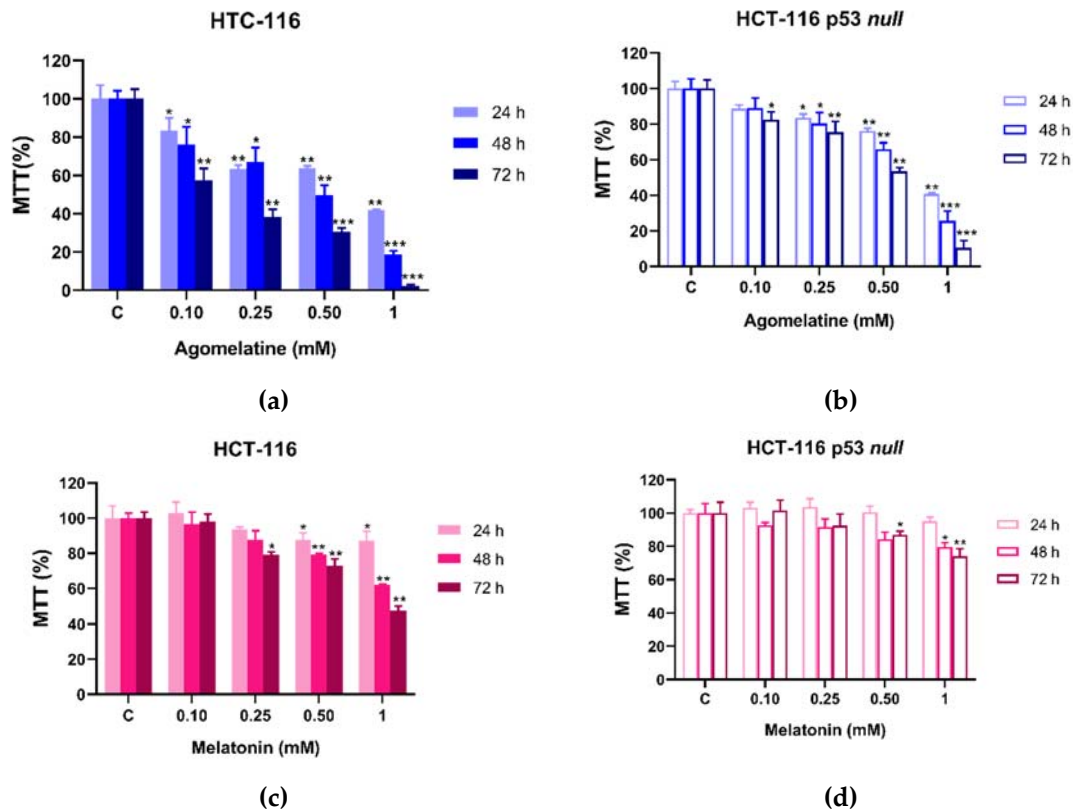

**Figure S1.** Growth inhibition of HCT-116 and HCT-116 p53 null cells after treatment with (a) (c) agomelatine (0-1 mM) and (b) (d) melatonin (0-1 mM) for 24, 48 and 72 hours. The results represented the mean  $\pm$  SD of 3 experiments performed in quadruplicate. \*P<0.05 vs C; \*\*P<0.01 vs C; \*\*\*P<0.001 vs C.

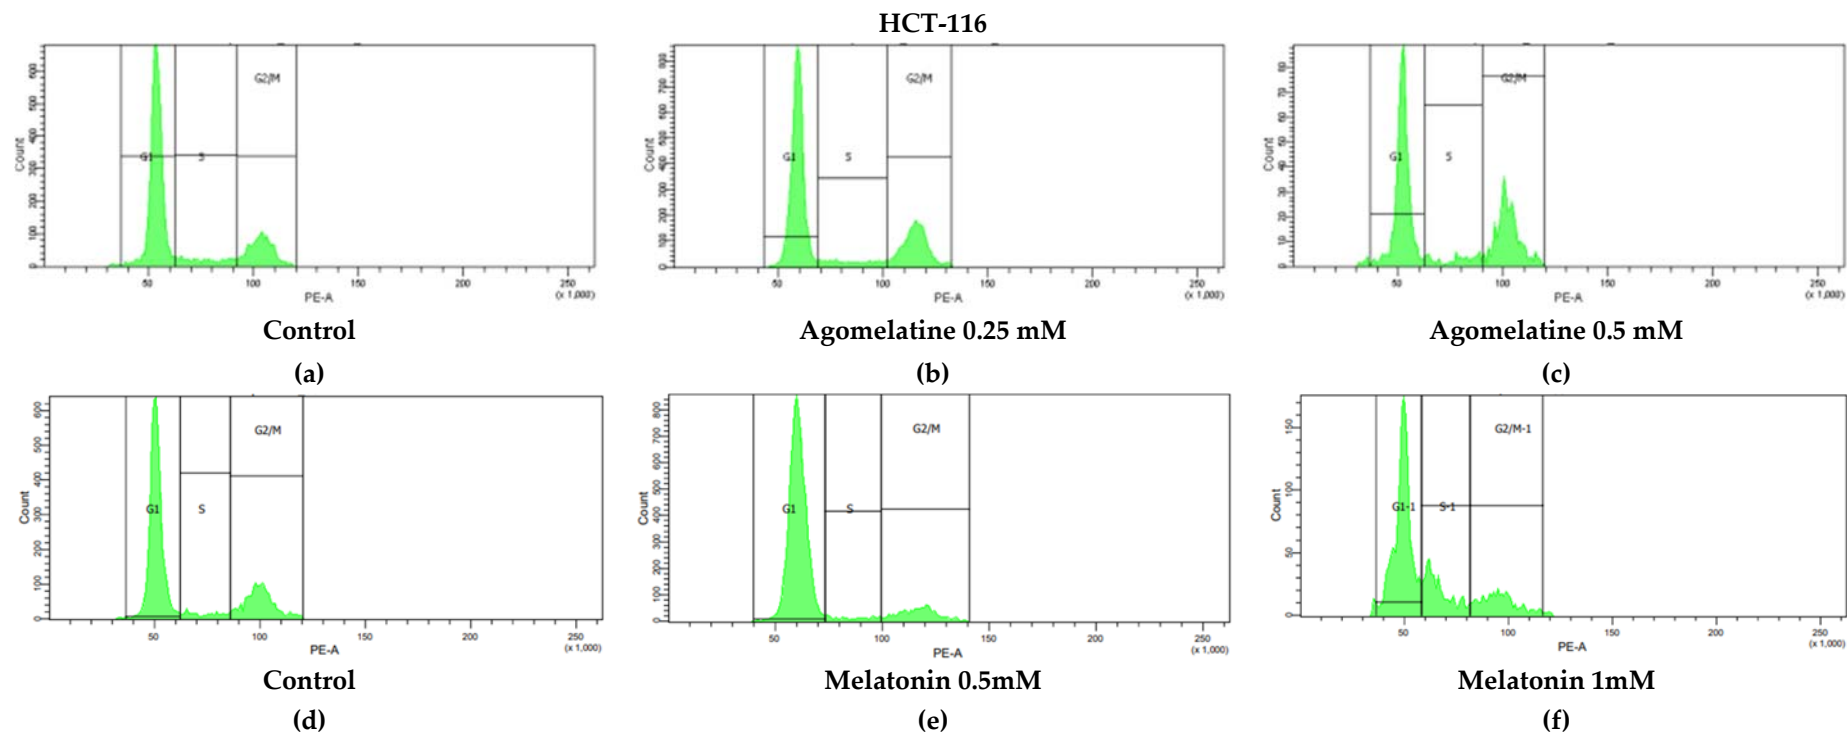

**Figure S2.** Raw data of cell cycle analysis by flow cytometry in HCT-116 cell line after treatment with agomelatine or melatonin.

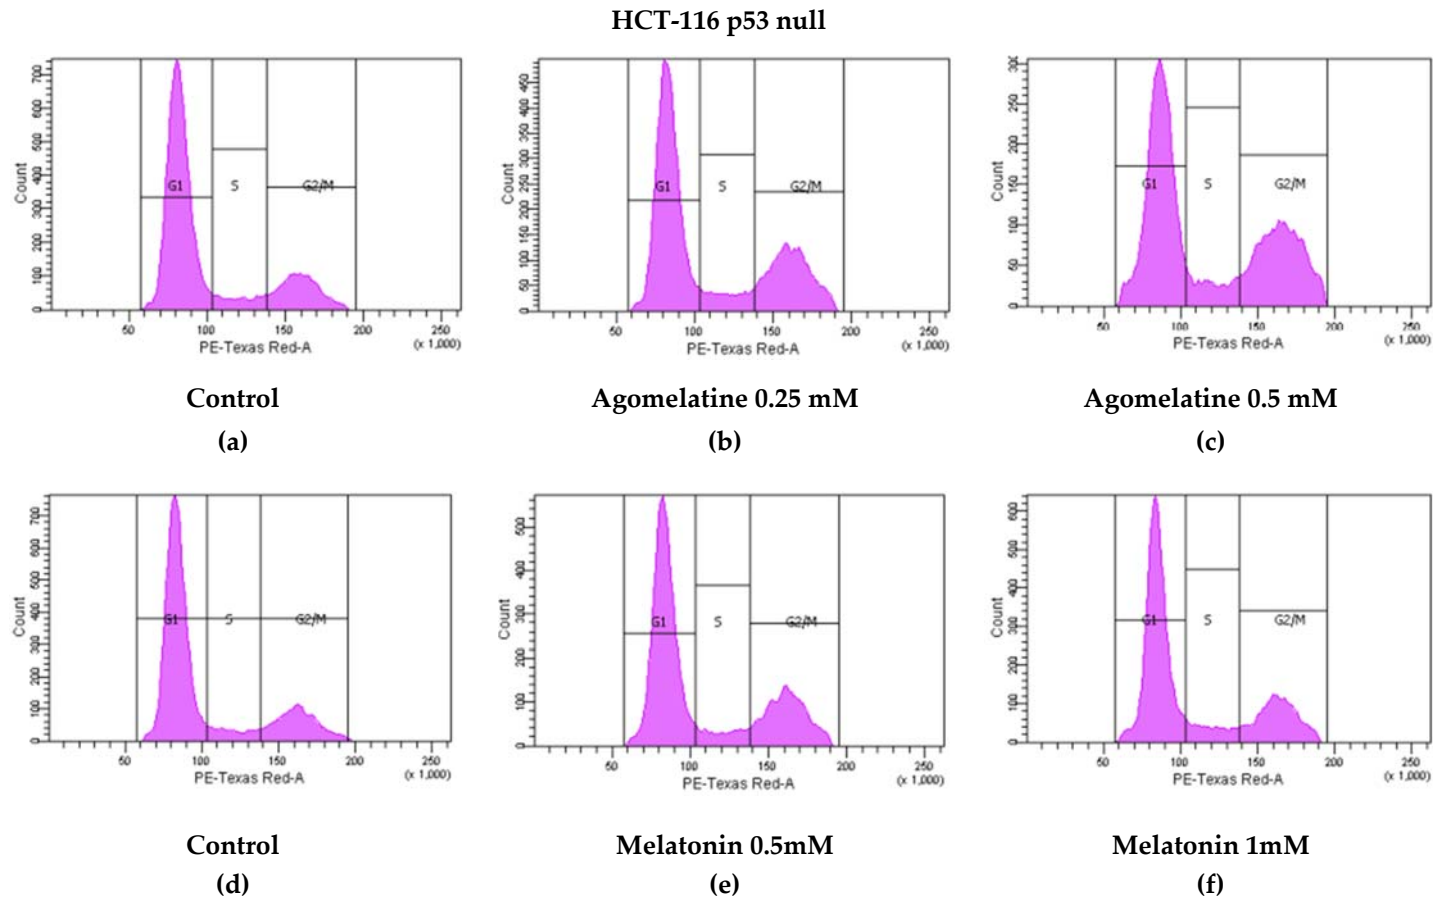

**Figure S3.** Raw data of cell cycle analysis by flow cytometry in HCT-116 p53 null cell line after treatment with agomelatine or melatonin.

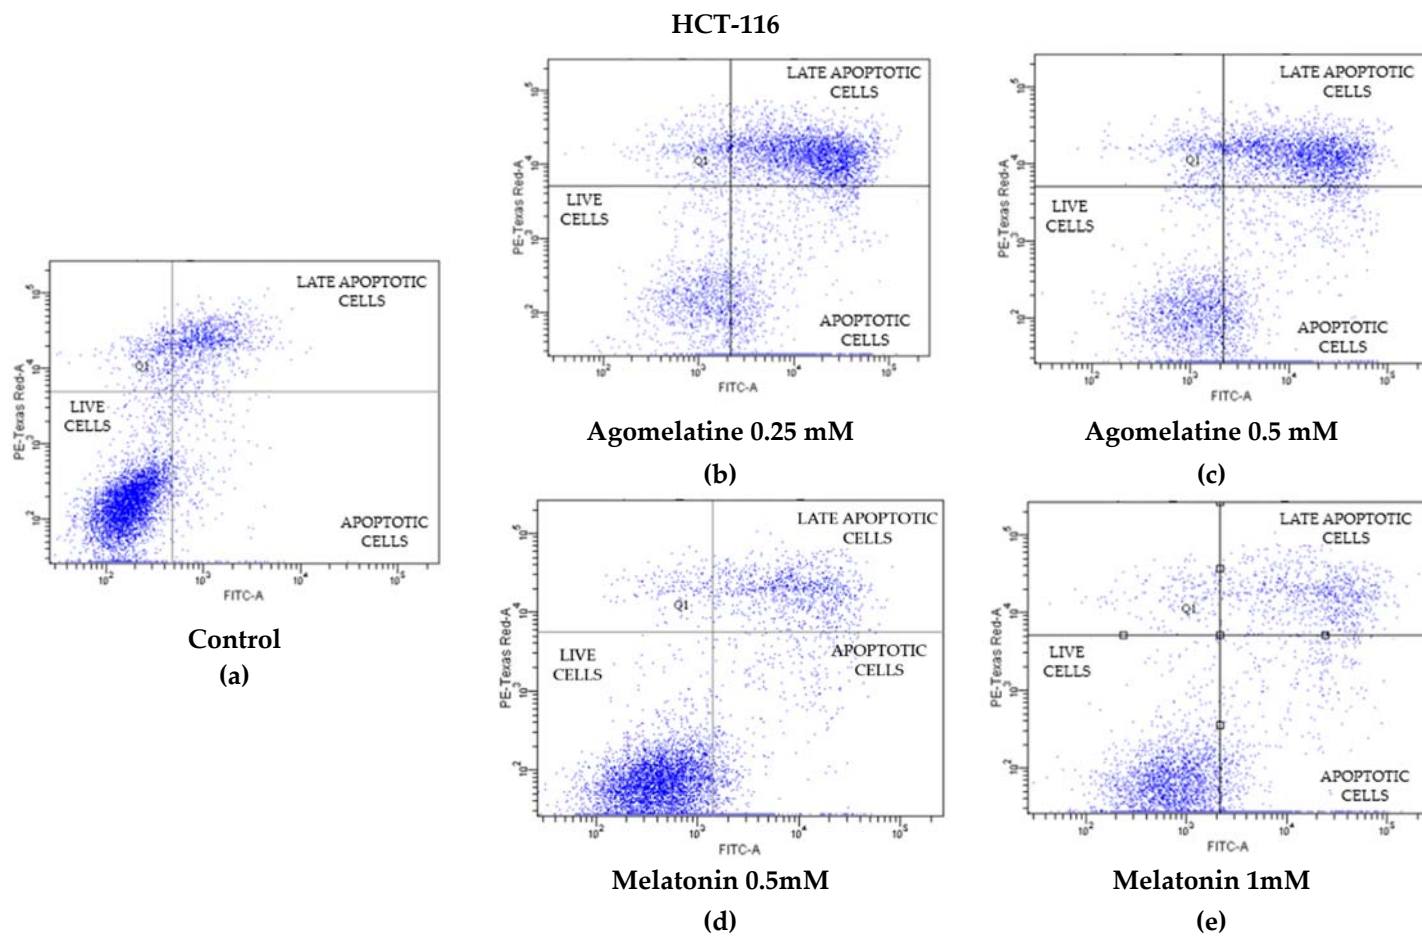

**Figure S4.** Raw data of apoptosis analysis by flow cytometry in HCT-116 cell line after treatment with agomelatine or melatonin.

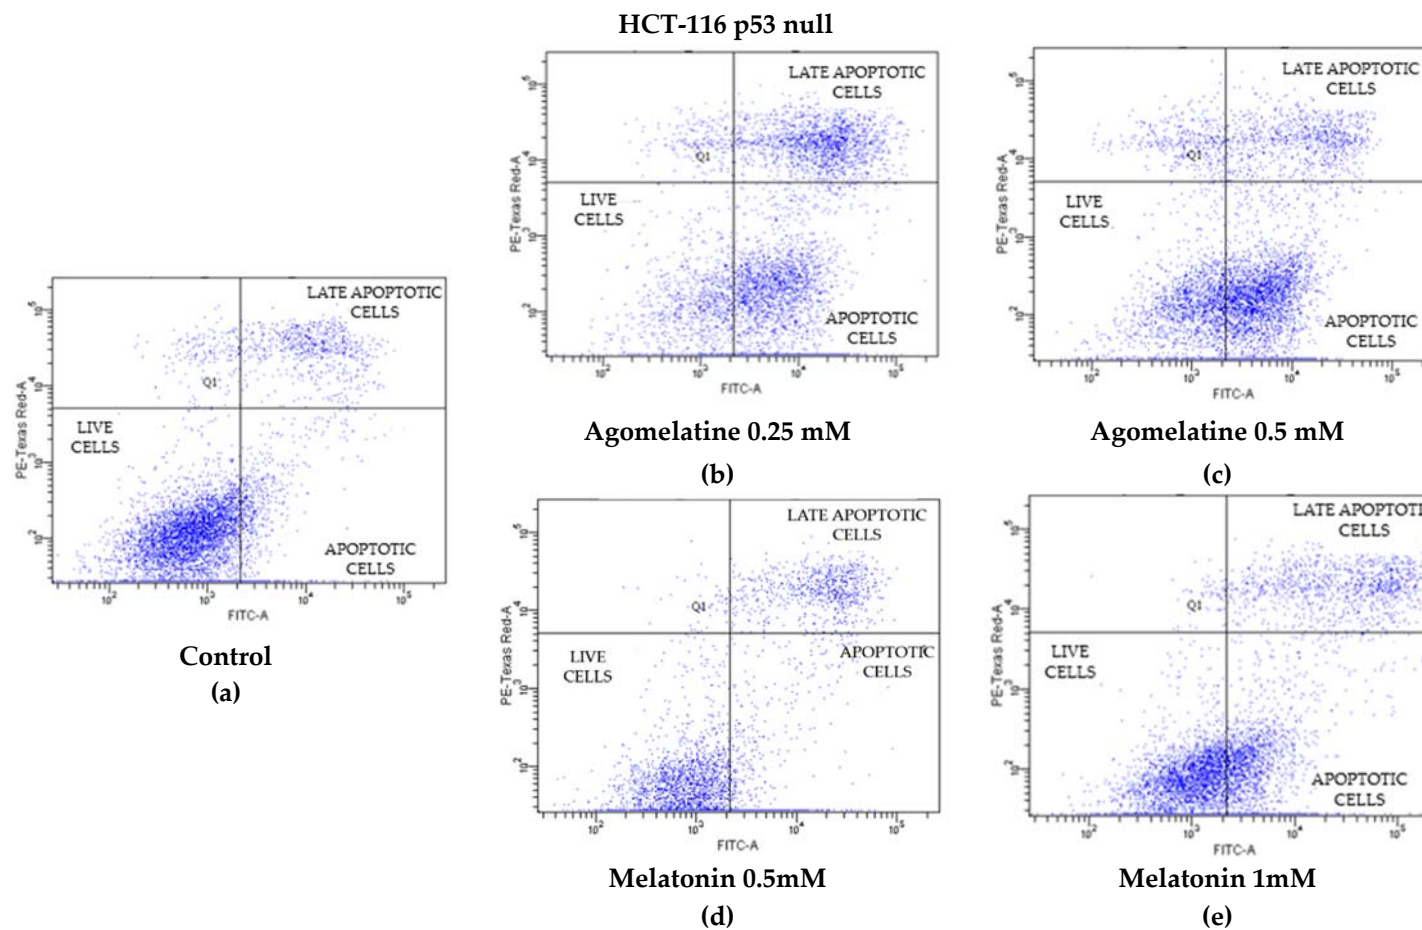

**Figure S5.** Raw data of apoptosis analysis by flow cytometry in HCT-116 cell line after treatment with agomelatine or melatonin.

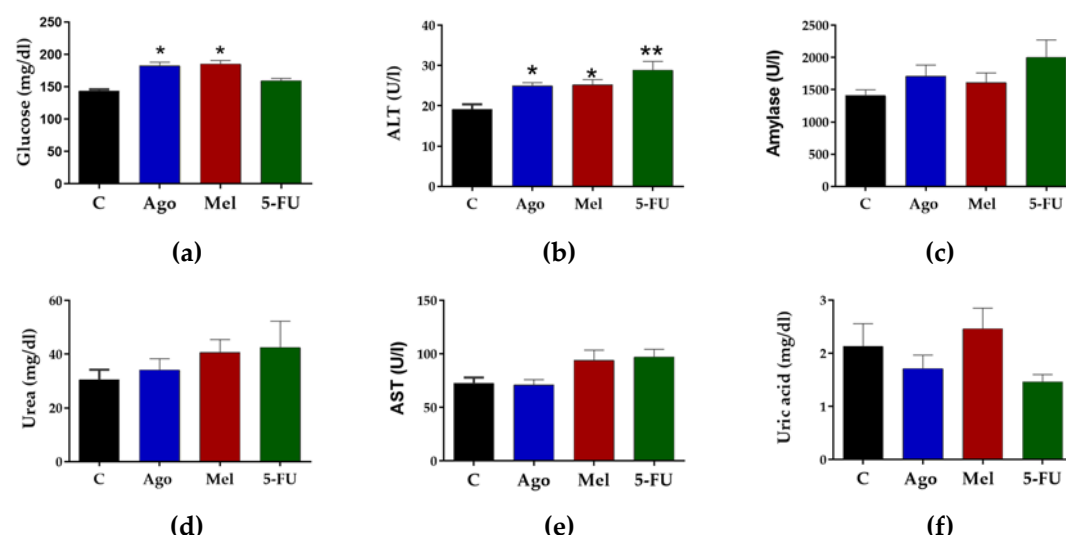

**Figure S6.** Levels of glucose (a), alanine aminotransferase (ALT) (b), amylase (c), urea (d), aspartame aminotransferase (e) and uric acid (f) in blood, present after the sacrifice of the animals. \*  $P<0.05$  C vs. Ago/Mel; \*\* $P<0.01$  C vs. 5-FU.

**Table S2.** Results at 24 hours of the cosinor analysis of the clock genes expression after agomelatine or melatonin treatments in the HCT-116 cell line.

| Gene  | Treatment | PR <sup>1</sup> | P-value <sup>2</sup> | Amplitude (A.U.) <sup>3</sup> | Acrophase (h) <sup>4</sup>  | MESOR (A.U.)                 |
|-------|-----------|-----------------|----------------------|-------------------------------|-----------------------------|------------------------------|
| Per1  | Control   | 81.32           | <0.0001              | $1.63 \pm 0.20$               | $3.38 \pm 0.95$             | $5.93 \pm 0.143$             |
|       | Ago 0.5   | 45.07           | 0.0112               | $6.06 \pm 1.73^*$             | $10.24 \pm 2.18^*$          | $8.49 \pm 1.22^*$            |
|       | Mel 1     | 72.88           | 0.0001               | $4.78 \pm 0.75^*$             | $5.46 \pm 0.86$             | $6.84 \pm 1.06$              |
| Per2  | Control   | 73.84           | <0.0001              | $0.087 \pm 0.013$             | $1.69 \pm 0.59$             | $0.293 \pm 0.009$            |
|       | Ago 0.5   | 59.78           | 0.0011               | $0.155 \pm 0.033$             | $8.75 \pm 0.81$             | $0.343 \pm 0.023^{***}$      |
|       | Mel 1     | 35.93           | 0.0355               | $0.118 \pm 0.041$             | $5.39 \pm 1.32$             | $0.305 \pm 0.029^{*,\#}$     |
| Per3  | Control   | 76.86           | <0.0001              | $0.73 \pm 0.10$               | $6.76 \pm 0.54$             | $0.83 \pm 0.07$              |
|       | Ago 0.5   | 62.12           | 0.0007               | $1.09 \pm 0.22$               | $7.05 \pm 0.77$             | $1.25 \pm 0.16$              |
|       | Mel 1     | 63.79           | 0.0005               | $1.70 \pm 0.33^{*,\#}$        | $7.07 \pm 0.74$             | $1.47 \pm 0.23^*$            |
| Cry1  | Control   | 74.52           | <0.0001              | $2.03 \pm 0.31$               | $6.34 \pm 0.96$             | $3.78 \pm 0.22$              |
|       | Ago 0.5   | 67.37           | 0.0002               | $2.18 \pm 0.39$               | $9.78 \pm 1.76^*$           | $4.15 \pm 0.28$              |
|       | Mel 1     | 72.36           | 0.0001               | $3.19 \pm 0.51^*$             | $6.80 \pm 1.09$             | $4.79 \pm 0.36^{\#}$         |
| Clock | Control   | 8.75            | 0.5033               | $0.021 \pm 0.018$             | $6.91 \pm 5.77$             | $0.265 \pm 0.012$            |
|       | Ago 0.5   | 63.61           | 0.0005               | $0.108 \pm 0.021^*$           | $3.49 \pm 0.68$             | $0.195 \pm 0.015^*$          |
|       | Mel 1     | 28.22           | 0.0832               | $0.110 \pm 0.046^*$           | $7.07 \pm 2.91$             | $0.400 \pm 0.032^{***,\#\#}$ |
| Bmal1 | Control   | 44.46           | 0.0121               | $0.0053 \pm 0.0029$           | $13.25 \pm 3.83$            | $0.020 \pm 0.001$            |
|       | Ago 0.5   | 18.65           | 0.2126               | $0.0059 \pm 0.0029$           | $11.61 \pm 6.25$            | $0.036 \pm 0.002^{***}$      |
|       | Mel 1     | 3.00            | 0.7956               | $0.0023 \pm 0.0034$           | $8.44 \pm 12.41$            | $0.023 \pm 0.002^{***}$      |
| Nr1d2 | Control   | 74.52           | <0.0001              | $2.10 \pm 0.43$               | $10.11 \pm 2.14$            | $4.21 \pm 0.31$              |
|       | Ago 0.5   | 67.37           | 0.0002               | $1.23 \pm 0.16^*$             | $3.76 \pm 0.47$             | $2.42 \pm 0.11^{***}$        |
|       | Mel 1     | 72.36           | 0.0001               | $1.48 \pm 0.27$               | $20.70 \pm 3.83^{***,\#\#}$ | $2.28 \pm 0.19^{***}$        |

<sup>1</sup>PR: Percentage of rhythm; <sup>2</sup>P-value: zero amplitude test; <sup>3</sup>A.U.: arbitrary units; <sup>4</sup>h: hours; \*  $P<0.05$  vs control, \*\* $P<0.01$  vs control, \*\*\* $P<0.001$  vs control; <sup>#</sup> $P<0.05$  vs agomelatine, <sup>##</sup> $P<0.01$  vs agomelatine, <sup>###</sup> $P<0.001$  vs agomelatine.

**Table S3.** Results at 24 hours of the cosinor analysis of the clock genes expression after agomelatine or melatonin treatments in the HCT-116 p53 null cell line.

| Gene         | Treatment | PR <sup>1</sup> | P-value <sup>2</sup> | Amplitude (A.U.) <sup>3</sup> | Acrophase (h) <sup>4</sup>     | MESOR (A.U.)                 |
|--------------|-----------|-----------------|----------------------|-------------------------------|--------------------------------|------------------------------|
| <b>Per1</b>  | Control   | 51.93           | 0.0041               | 1.77 ± 0.49*                  | 3.49 ± 1.12                    | 4.86 ± 0.33 <sup>†</sup>     |
|              | Ago 0.5   | 39.04           | 0.0244               | 5.87 ± 1.89                   | 3.23 ± 0.82                    | 7.46 ± 1.34*                 |
|              | Mel 1     | 81.12           | <0.0001              | 2.42 ± 0.31 <sup>‡</sup>      | 4.08 ± 0.52                    | 5.87 ± 0.22                  |
| <b>Per2</b>  | Control   | 73.63           | <0.0001              | 0.282 ± 0.042 <sup>†</sup>    | 5.65 ± 0.95 <sup>†</sup>       | 0.386 ± 0.032 <sup>†</sup>   |
|              | Ago 0.5   | 50.15           | 0.0054               | 0.271 ± 0.069                 | 5.96 ± 1.53                    | 0.329 ± 0.050                |
|              | Mel 1     | 60.68           | 0.0009               | 0.327 ± 0.064                 | 6.70 ± 1.50                    | 0.365 ± 0.049                |
| <b>Per3</b>  | Control   | 81.66           | <0.0001              | 0.181 ± 0.022 <sup>††</sup>   | 5.42 ± 0.66                    | 0.378 ± 0.015 <sup>††</sup>  |
|              | Ago 0.5   | 15.86           | 0.2739               | 0.044 ± 0.027 <sup>***</sup>  | 5.19 ± 3.09                    | 0.252 ± 0.019 <sup>***</sup> |
|              | Mel 1     | 83.65           | <0.0001              | 0.181 ± 0.021 <sup>###</sup>  | 5.76 ± 0.66                    | 0.307 ± 0.015 <sup>*,#</sup> |
| <b>Cry1</b>  | Control   | 90.30           | <0.0001              | 2.70 ± 0.22                   | 5.24 ± 0.46                    | 4.57 ± 0.16 <sup>†</sup>     |
|              | Ago 0.5   | 91.51           | <0.0001              | 2.64 ± 0.21                   | 9.55 ± 0.75 <sup>***</sup>     | 4.06 ± 0.15*                 |
|              | Mel 1     | 95.49           | <0.0001              | 2.69 ± 0.15                   | 6.15 ± 0.35 <sup>###</sup>     | 4.22 ± 0.11                  |
| <b>Clock</b> | Control   | 61.31           | 0.0008               | 0.049 ± 0.010                 | 6.42 ± 1.32                    | 0.198 ± 0.007 <sup>††</sup>  |
|              | Ago 0.5   | 39.02           | 0.0002               | 0.059 ± 0.011                 | 5.24 ± 0.95                    | 0.207 ± 0.077                |
|              | Mel 1     | 50.92           | 0.0048               | 0.053 ± 0.013                 | 6.61 ± 1.67                    | 0.235 ± 0.009                |
| <b>Bmal1</b> | Control   | 32.37           | 0.0532               | 0.0036 ± 0.0013               | 16.53 ± 0.62                   | 0.013 ± 0.001 <sup>††</sup>  |
|              | Ago 0.5   | 4.06            | 0.7328               | 0.0012 ± 0.0014               | 4.97 ± 0.63                    | 0.014 ± 0.001 <sup>***</sup> |
|              | Mel 1     | 7.02            | 0.5792               | 0.0019 ± 0.0018               | 2.24 ± 2.11                    | 0.014 ± 0.001 <sup>***</sup> |
| <b>Nr1d2</b> | Control   | 92.54           | <0.0001              | 1.32 ± 0.09                   | 2.34 ± 0.17 <sup>†</sup>       | 2.51 ± 0.06 <sup>††</sup>    |
|              | Ago 0.5   | 83.42           | <0.0001              | 1.33 ± 0.15                   | 1.85 ± 0.21*                   | 2.64 ± 0.11*                 |
|              | Mel 1     | 73.99           | <0.0001              | 1.20 ± 0.18                   | 0.59 ± 0.09 <sup>***,###</sup> | 2.79 ± 0.13                  |

<sup>1</sup>PR: Percentage of rhythm; <sup>2</sup>P-value: zero amplitude test; <sup>3</sup>A.U.: arbitrary units; <sup>4</sup>h: hours; \* P<0.05 vs control, \*\*P<0.01 vs control, \*\*\*P<0.001 vs control; #P<0.05 vs agomelatine, ##P<0.01 vs agomelatine, ###P<0.001 vs agomelatine. <sup>†</sup>P<0.05 vs HCT-116, <sup>††</sup> P<0.01 vs HCT-116.

**Table S4.** Results at 24 hours of the cosinor analysis of Sirt1 gene expression after agomelatine or melatonin treatments in the HCT-116 and HCT-116 p53 null cell lines.

| Cell line               | Treatment | PR <sup>1</sup> | P-value <sup>2</sup> | Amplitude (A.U.) <sup>3</sup> | Acrophase (h) <sup>4</sup>   | MESOR (A.U.)                   |
|-------------------------|-----------|-----------------|----------------------|-------------------------------|------------------------------|--------------------------------|
| <b>HCT-116</b>          | Control   | 19.34           | 0.1995               | 0.256 ± 0.135                 | 4.13 ± 2.01                  | 1.38 ± 0.09                    |
|                         | Ago 0.5   | 38.31           | 0.0267               | 0.170 ± 0.056                 | 21.12 ± 1.25 <sup>***</sup>  | 1.41 ± 0.04                    |
|                         | Mel 1     | 81.95           | <0.0001              | 0.488 ± 0.059 <sup>*,#</sup>  | 0.23 ± 0.03 <sup>*,###</sup> | 1.97 ± 0.04 <sup>***,###</sup> |
| <b>HCT-116 p53 null</b> | Control   | 34.47           | 0.042                | 0.255 ± 0.090                 | 18.83 ± 6.71                 | 3.79 ± 0.06 <sup>†††</sup>     |
|                         | Ago 0.5   | 95.96           | <0.0001              | 0.908 ± 0.048 <sup>***</sup>  | 21.61 ± 1.09                 | 3.60 ± 0.34                    |
|                         | Mel 1     | 93.55           | <0.0001              | 1.050 ± 0.070 <sup>###</sup>  | 2.93 ± 0.21 <sup>*,##</sup>  | 4.21 ± 0.05 <sup>#</sup>       |

<sup>1</sup>PR: Percentage of rhythm; <sup>2</sup>P-value: zero amplitude test; <sup>3</sup>A.U.: arbitrary units; <sup>4</sup>h: hours; \* P<0.05 vs control, \*\*P<0.01 vs control, \*\*\*P<0.001 vs control; #P<0.05 vs agomelatine, ##P<0.01 vs agomelatine, ###P<0.001 vs agomelatine. <sup>†††</sup> P<0.001 vs HCT-116.

**Table S5.** Results at 24 hours of the cosinor analysis of Prx1 gene expression after agomelatine or melatonin treatments in the HCT-116 and HCT-116 p53 null cell lines.

|                         | Treatment | PR <sup>1</sup> | P-value <sup>2</sup> | Amplitude (A.U.) <sup>3</sup> | Acrophase (h) <sup>4</sup>      | MESOR (A.U.)            |
|-------------------------|-----------|-----------------|----------------------|-------------------------------|---------------------------------|-------------------------|
| <b>HCT-116</b>          | Control   | 82.62           | <0.0001              | 67.2 ± 8.2                    | 3.35 ± 0.49                     | 299 ± 6                 |
|                         | Ago 0.5   | 76.24           | <0.0001              | 61.5 ± 8.9                    | 2.56 ± 0.44                     | 235 ± 6 <sup>***</sup>  |
|                         | Mel 1     | 68.02           | 0.0002               | 60.5 ± 10.7                   | 21.88 ± 0.21 <sup>***,###</sup> | 336 ± 8 <sup>*</sup>    |
| <b>HCT-116 p53 null</b> | Control   | 80.94           | <0.0001              | 83 ± 11                       | 0.85 ± 0.11 <sup>††</sup>       | 464 ± 13 <sup>†††</sup> |
|                         | Ago 0.5   | 67.76           | 0.0002               | 99 ± 17                       | 3.77 ± 0.73 <sup>***</sup>      | 576 ± 7 <sup>***</sup>  |
|                         | Mel 1     | 75.83           | <0.0001              | 108 ± 2                       | 1.22 ± 0.68 <sup>###</sup>      | 586 ± 12 <sup>###</sup> |

<sup>1</sup>PR: Percentage of rhythm; <sup>2</sup> P-value: zero amplitude test; <sup>3</sup>A.U.: arbitrary units; <sup>4</sup>h: hours; \* P<0.05 vs control, \*\*\*P<0.001 vs control; ###P<0.001 vs agomelatine. †† P<0.01 vs HCT-116, ††† P<0.001 vs HCT-116.



**Table S6.** Median of Ct values obtained in the circadian rhythmicity analysis for each gene at all conditions included in the study in HCT-116 cells.

|          | Gene  |       |       |       |       |       |       |       |       |       |       |       |       |       |       |       |       |       |       |       |       |       |       |       |       |       |       |
|----------|-------|-------|-------|-------|-------|-------|-------|-------|-------|-------|-------|-------|-------|-------|-------|-------|-------|-------|-------|-------|-------|-------|-------|-------|-------|-------|-------|
|          | Per1  |       |       | Per2  |       |       | Per3  |       |       | Cry1  |       |       | Clock |       |       | Bmal1 |       |       | Nr1d2 |       |       | Sirt1 |       |       | Prx1  |       |       |
| Time (h) | C     | M el  | Ag o  |
| 4        | 22.56 | 22.72 | 21.79 | 26.44 | 26.43 | 26.05 | 26.10 | 25.71 | 25.26 | 22.80 | 22.33 | 22.99 | 27.46 | 27.32 | 27.65 | 31.48 | 30.87 | 31.18 | 24.50 | 24.11 | 23.65 | 24.46 | 24.38 | 25.27 | 17.08 | 17.02 | 17.11 |
| 8        | 22.82 | 22.19 | 21.68 | 26.62 | 27.03 | 26.20 | 26.18 | 25.92 | 25.33 | 23.38 | 22.91 | 23.40 | 27.66 | 27.16 | 27.99 | 31.84 | 30.96 | 31.09 | 25.12 | 24.92 | 23.91 | 25.17 | 25.13 | 25.08 | 17.45 | 17.24 | 17.71 |
| 12       | 23.29 | 22.11 | 22.34 | 27.22 | 26.82 | 26.34 | 26.24 | 26.45 | 25.64 | 23.52 | 23.10 | 22.88 | 28.00 | 27.13 | 27.75 | 31.08 | 30.73 | 30.46 | 25.55 | 25.05 | 25.68 | 25.67 | 24.85 | 25.55 | 17.55 | 17.60 | 18.11 |
| 16       | 22.68 | 22.54 | 22.49 | 28.07 | 28.54 | 27.33 | 27.83 | 27.49 | 27.19 | 24.35 | 24.08 | 23.47 | 27.62 | 27.47 | 28.09 | 31.41 | 31.07 | 30.46 | 24.47 | 24.04 | 24.79 | 25.07 | 24.37 | 24.91 | 17.23 | 16.92 | 17.58 |
| 20       | 22.53 | 22.68 | 22.97 | 27.72 | 28.60 | 28.20 | 27.91 | 28.40 | 26.85 | 24.59 | 24.51 | 24.53 | 27.90 | 27.86 | 27.91 | 31.68 | 31.75 | 31.25 | 23.98 | 23.92 | 24.44 | 25.21 | 24.47 | 25.02 | 16.82 | 16.87 | 17.46 |
| 24       | 22.23 | 21.91 | 23.25 | 26.86 | 27.36 | 28.47 | 27.04 | 28.69 | 26.98 | 24.15 | 24.33 | 25.12 | 28.07 | 27.75 | 28.53 | 32.41 | 31.67 | 31.38 | 24.11 | 23.70 | 23.91 | 25.66 | 24.68 | 24.96 | 17.32 | 16.98 | 17.51 |
| 28       | 23.07 | 21.96 | 22.63 | 27.84 | 27.76 | 28.36 | 27.36 | 28.57 | 27.67 | 24.02 | 24.07 | 24.77 | 29.47 | 29.25 | 29.29 | 33.84 | 33.75 | 32.46 | 24.69 | 24.54 | 23.88 | 25.13 | 24.79 | 24.84 | 17.12 | 16.73 | 17.78 |
| 32       | 22.78 | 22.36 | 22.27 | 28.05 | 28.64 | 26.87 | 27.86 | 27.01 | 25.66 | 23.74 | 23.80 | 23.72 | 29.20 | 29.16 | 29.59 | 33.18 | 33.47 | 32.38 | 25.50 | 25.36 | 24.10 | 25.10 | 24.85 | 25.20 | 16.85 | 16.75 | 17.95 |
| 36       | 22.60 | 22.85 | 21.91 | 28.25 | 27.62 | 26.87 | 26.45 | 27.01 | 25.50 | 23.89 | 23.24 | 23.10 | 29.05 | 28.69 | 28.84 | 32.54 | 31.70 | 31.96 | 25.09 | 24.39 | 24.12 | 24.61 | 24.37 | 25.37 | 16.82 | 16.56 | 18.03 |
| 40       | 22.16 | 22.92 | 22.78 | 28.17 | 27.96 | 26.37 | 27.07 | 28.02 | 27.21 | 24.20 | 23.82 | 23.33 | 28.70 | 28.80 | 28.63 | 32.12 | 32.15 | 31.64 | 24.43 | 24.26 | 23.94 | 25.08 | 24.30 | 25.04 | 16.92 | 16.80 | 17.07 |
| 44       | 22.63 | 22.55 | 20.74 | 26.89 | 28.18 | 26.53 | 26.89 | 29.69 | 28.66 | 23.42 | 24.19 | 24.54 | 29.75 | 29.65 | 29.65 | 32.86 | 32.77 | 31.16 | 23.60 | 23.54 | 23.75 | 25.70 | 25.09 | 25.84 | 17.24 | 17.10 | 17.38 |
| 48       | 22.86 | 22.39 | 20.85 | 26.78 | 27.33 | 29.16 | 26.71 | 29.41 | 28.26 | 22.97 | 23.46 | 24.77 | 30.10 | 28.99 | 30.01 | 33.59 | 32.69 | 31.44 | 24.25 | 23.63 | 23.43 | 25.66 | 25.01 | 26.43 | 17.26 | 17.11 | 18.25 |

**Table S7.** Median of Ct values obtained in the circadian rhythmicity analysis for each gene at all conditions included in the study in HCT-116 p53 null cells.

|          | Gene  |       |       |       |       |       |       |       |       |       |       |       |       |       |       |       |       |       |       |       |       |       |       |       |       |       |       |
|----------|-------|-------|-------|-------|-------|-------|-------|-------|-------|-------|-------|-------|-------|-------|-------|-------|-------|-------|-------|-------|-------|-------|-------|-------|-------|-------|-------|
|          | Per1  |       |       | Per2  |       |       | Per3  |       |       | Cry1  |       |       | Clock |       |       | Bmal1 |       |       | Nr1d2 |       |       | Sirt1 |       |       | Prx1  |       |       |
| Time (h) | C     | Mel   | Ag o  |
| 4        | 22.75 | 22.72 | 21.91 | 26.48 | 26.27 | 26.67 | 26.34 | 26.59 | 26.95 | 22.65 | 22.88 | 23.30 | 28.16 | 27.67 | 27.90 | 32.14 | 31.50 | 31.61 | 24.18 | 24.02 | 23.81 | 23.35 | 23.03 | 23.86 | 16.17 | 16.02 | 16.18 |
| 8        | 23.31 | 23.05 | 22.18 | 26.74 | 26.55 | 27.51 | 26.84 | 26.75 | 28.08 | 23.06 | 22.94 | 23.05 | 28.03 | 27.70 | 28.13 | 32.63 | 31.77 | 32.02 | 24.74 | 24.11 | 24.21 | 23.97 | 23.55 | 24.27 | 16.47 | 16.54 | 16.80 |
| 12       | 23.37 | 22.91 | 23.04 | 27.84 | 27.93 | 27.35 | 27.16 | 27.73 | 27.67 | 23.65 | 23.69 | 23.12 | 28.36 | 28.29 | 28.42 | 32.12 | 31.74 | 31.09 | 25.69 | 25.44 | 25.56 | 23.77 | 24.13 | 24.09 | 16.71 | 16.69 | 16.94 |
| 16       | 23.40 | 23.34 | 23.11 | 28.90 | 29.13 | 28.80 | 28.00 | 28.42 | 27.94 | 24.45 | 24.59 | 23.60 | 28.44 | 28.14 | 28.49 | 31.37 | 31.86 | 30.69 | 24.66 | 24.76 | 24.74 | 23.67 | 23.66 | 23.88 | 16.44 | 16.43 | 16.85 |
| 20       | 22.90 | 22.97 | 23.80 | 27.89 | 28.61 | 29.05 | 27.74 | 27.95 | 27.79 | 24.33 | 24.65 | 24.97 | 28.60 | 28.35 | 28.16 | 32.23 | 31.74 | 31.33 | 23.94 | 23.84 | 24.44 | 23.63 | 23.32 | 23.48 | 16.27 | 16.21 | 16.65 |
| 24       | 22.33 | 22.24 | 22.95 | 27.13 | 27.78 | 28.87 | 27.18 | 27.77 | 28.00 | 23.61 | 23.84 | 25.37 | 28.27 | 28.41 | 27.75 | 32.25 | 32.41 | 30.94 | 23.73 | 23.74 | 23.69 | 23.87 | 23.47 | 23.59 | 16.29 | 16.27 | 16.54 |
| 28       | 22.64 | 23.05 | 22.16 | 27.27 | 27.89 | 28.48 | 26.45 | 26.54 | 27.48 | 23.23 | 23.83 | 24.89 | 28.98 | 29.09 | 28.90 | 31.78 | 31.74 | 31.40 | 23.47 | 23.47 | 23.38 | 24.03 | 24.08 | 23.63 | 16.26 | 16.41 | 16.96 |
| 32       | 22.80 | 22.75 | 21.85 | 27.82 | 27.93 | 27.24 | 27.00 | 27.50 | 26.89 | 23.33 | 23.56 | 24.03 | 28.95 | 28.62 | 28.76 | 31.35 | 30.97 | 30.97 | 23.64 | 24.01 | 22.71 | 24.10 | 23.58 | 23.68 | 16.52 | 16.33 | 16.97 |
| 36       | 23.01 | 23.57 | 22.17 | 28.31 | 29.29 | 27.19 | 27.64 | 27.74 | 26.64 | 24.68 | 24.19 | 23.58 | 29.44 | 28.80 | 28.28 | 30.96 | 30.76 | 30.66 | 23.72 | 23.72 | 22.70 | 23.71 | 23.76 | 23.58 | 16.33 | 16.56 | 18.03 |
| 40       | 22.59 | 22.63 | 22.53 | 28.35 | 29.07 | 27.44 | 27.62 | 28.03 | 26.99 | 24.66 | 24.64 | 23.62 | 29.15 | 29.02 | 28.07 | 30.85 | 30.64 | 30.41 | 23.49 | 23.40 | 22.95 | 23.99 | 23.69 | 23.57 | 16.21 | 16.80 | 17.07 |
| 44       | 22.14 | 22.60 | 24.29 | 26.90 | 27.14 | 27.62 | 26.35 | 26.35 | 25.90 | 23.49 | 23.86 | 24.00 | 28.98 | 28.21 | 28.12 | 31.43 | 30.72 | 30.43 | 23.01 | 23.04 | 22.64 | 24.29 | 23.75 | 24.00 | 16.47 | 17.10 | 17.38 |
| 48       | 22.04 | 22.64 | 23.07 | 27.27 | 26.62 | 28.17 | 27.74 | 27.41 | 26.53 | 23.30 | 23.19 | 24.56 | 29.58 | 28.50 | 28.75 | 31.61 | 31.05 | 30.83 | 23.92 | 23.19 | 22.75 | 24.09 | 23.42 | 23.63 | 16.14 | 17.11 | 18.25 |
